# Supplementary material for: Metabolomics and machine learning approaches for diagnostic and prognostic biomarkers screening in sepsis
Source: PubMed Central journal article supplement (PMC10634148; doi:10.1186/s12871-023-02317-4), 2023-11-09
Supplement: 12871_2023_2317_MOESM2_ESM.pdf [file 12871_2023_2317_MOESM2_ESM.pdf]

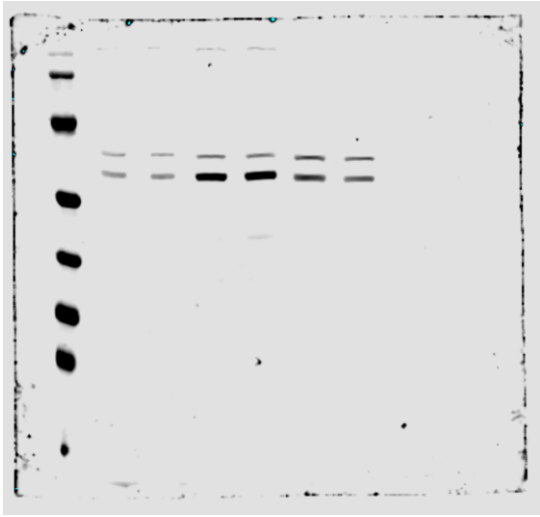

MAOA  
60KDa

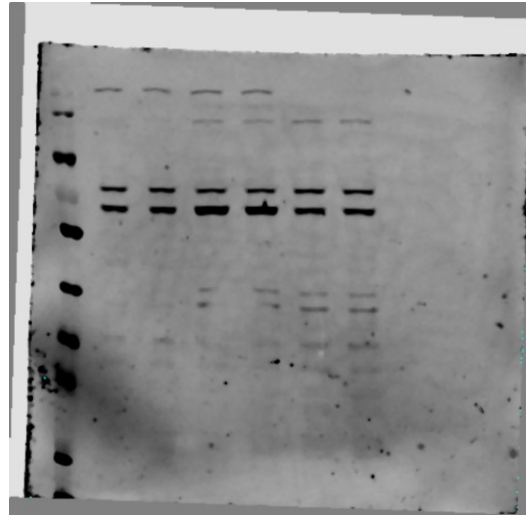

MAOA  
60KDa

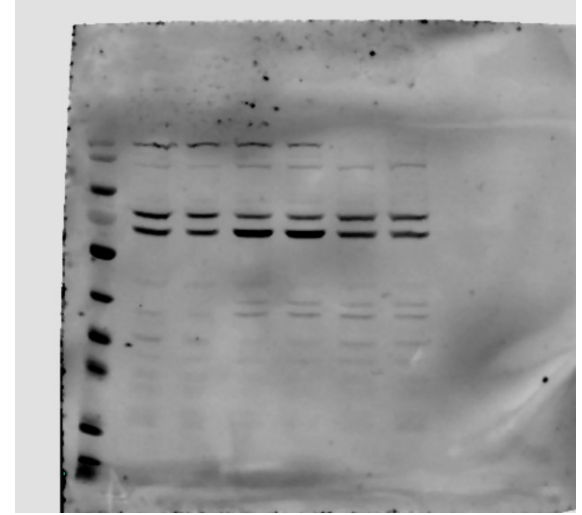

MAOA  
60KDa

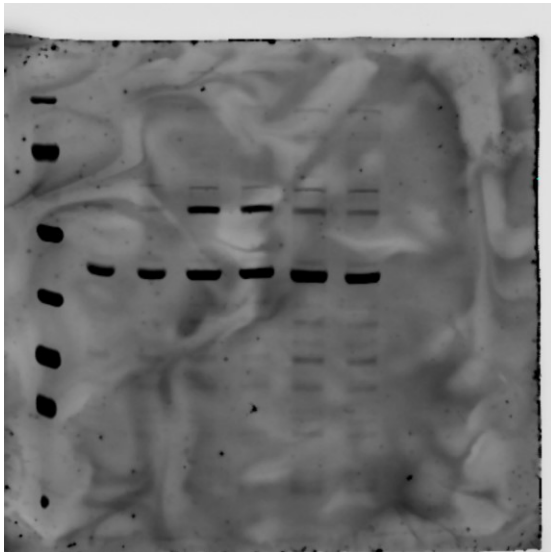

MAOA  
60KDa  
 $\beta$ -actin  
42KDa

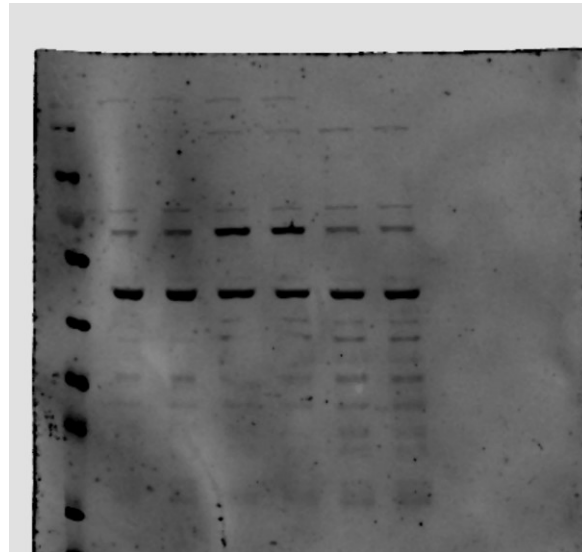

MAOA  
60KDa  
 $\beta$ -actin  
42KDa

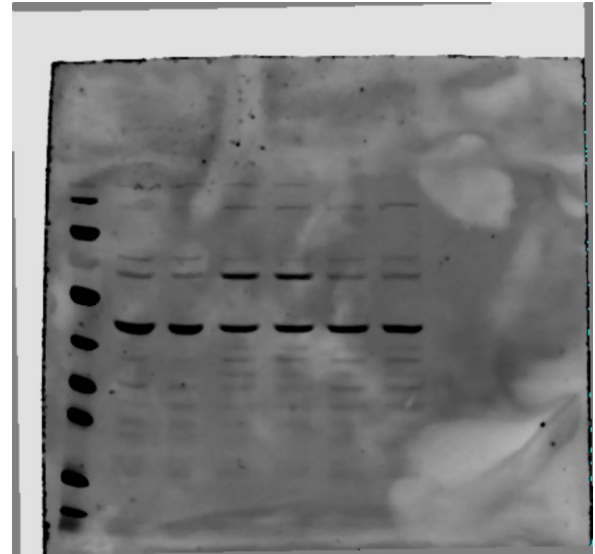

MAOA  
60KDa  
 $\beta$ -actin  
42KDa
